# Supplementary material for: Carbon Black Functionalized with Serinol Pyrrole to Replace Silica in Elastomeric Composites
Source: MDPI journal article supplement (doi:10.3390/polym16091214), 2024-04-26
Supplement: s1 [file s1]

# Carbon Black Functionalized with Serinol Pyrrole to Replace Silica in Elastomeric Composites

Federica Magaletti <sup>1</sup>, Martina Galbusera <sup>1</sup>, Davide Gentile <sup>1</sup>, Ulrich Giese <sup>2</sup>, Vincenzina Barbera <sup>1,\*</sup> and Maurizio Galimberti <sup>1,\*</sup>

<sup>1</sup> Department of Chemistry, Materials and Chemical Engineering "G. Natta", Politecnico di Milano, Via Mancinelli 7, 20131 Milan, Italy; federica.magaletti@polimi.it (F.M.); martina.galbusera@mail.polimi.it (M.G.); davide.gentile@polimi.it (D.G.)

<sup>2</sup> Deutsches Institut für Kautschuktechnologie e. V., Eupener Straße 33, 30519 Hannover, Germany; ulrich.giese@dikauschuk.de

\* Correspondence: vincenzina.barbera@polimi.it (V.B.); maurizio.galimberti@polimi.it (M.G.)

**Keywords:** carbon black; serinol pyrrole; functionalization; rubber compounds; elastomeric composites; Payne effect; hysteresis

## Supplementary Material

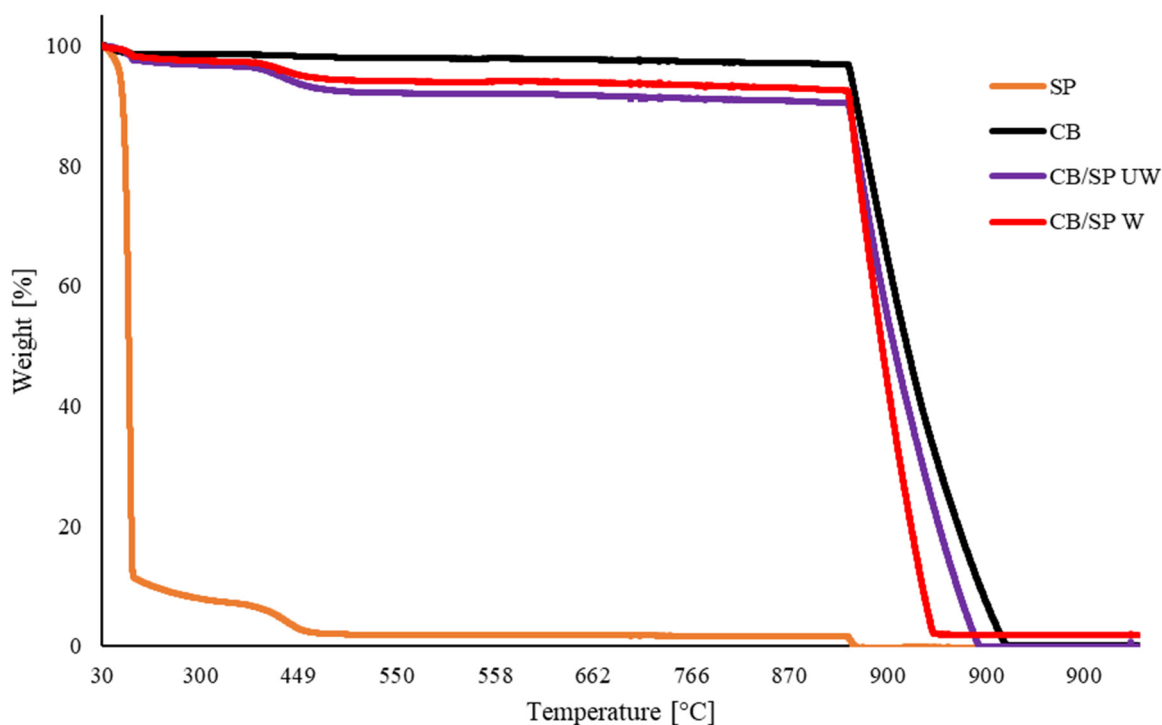

**Figure S1.** Thermograph from TGA analysis of CB/SP

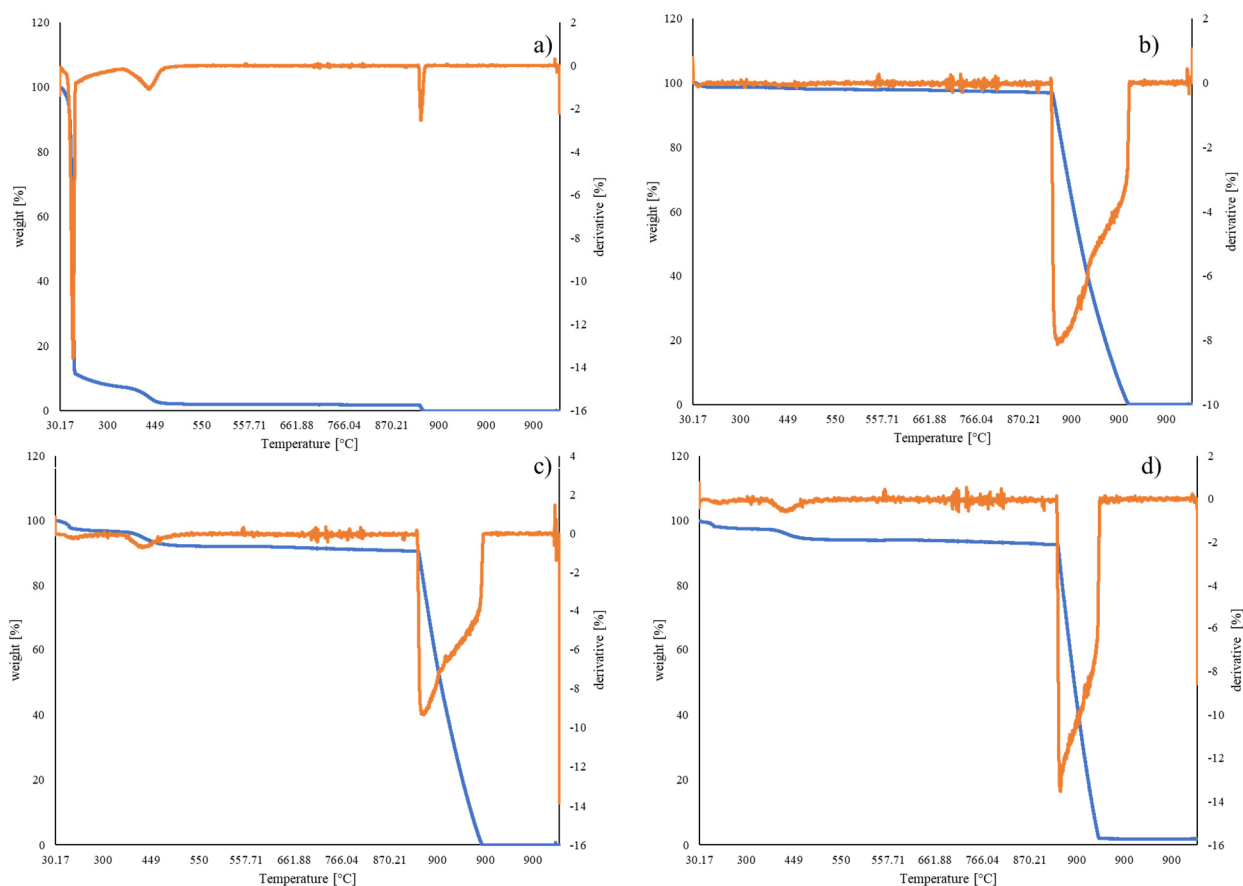

**Figure S2.** Thermogravimetric curves for SP (a), CB (b), CB/SP UW (c); CB/SP W (d);

**Table S1.** Data from the crosslinking of composites of Table 1<sup>a,b</sup>

|                                          | Silica | CB N234 | CB/SP |
|------------------------------------------|--------|---------|-------|
| <b>M<sub>L</sub> [dNm]</b>               | 3.12   | 2.68    | 2.67  |
| <b>M<sub>H</sub> [dNm]</b>               | 26.85  | 21.64   | 19.68 |
| <b>M<sub>H</sub>-M<sub>L</sub> [dNm]</b> | 23.73  | 18.96   | 17.01 |
| <b>t<sub>s1</sub> [min]</b>              | 2.32   | 3.28    | 2.76  |
| <b>t<sub>90</sub> [min]</b>              | 9.88   | 8.96    | 7.61  |
| <b>curing rate [dNM/min]</b>             | 3.14   | 3.34    | 3.51  |

<sup>a</sup> For experimental details see the experimental part

<sup>b</sup> M<sub>L</sub>: minimum modulus, M<sub>H</sub>: maximum modulus, t<sub>s1</sub>: induction crosslinking time, t<sub>90</sub>: optimum crosslinking time,

<sup>c</sup> the curing rate was calculated by means of the following equation:

$$\text{Curing Rate} = \frac{M_H - M_L}{t_{90} - t_{s1}}$$

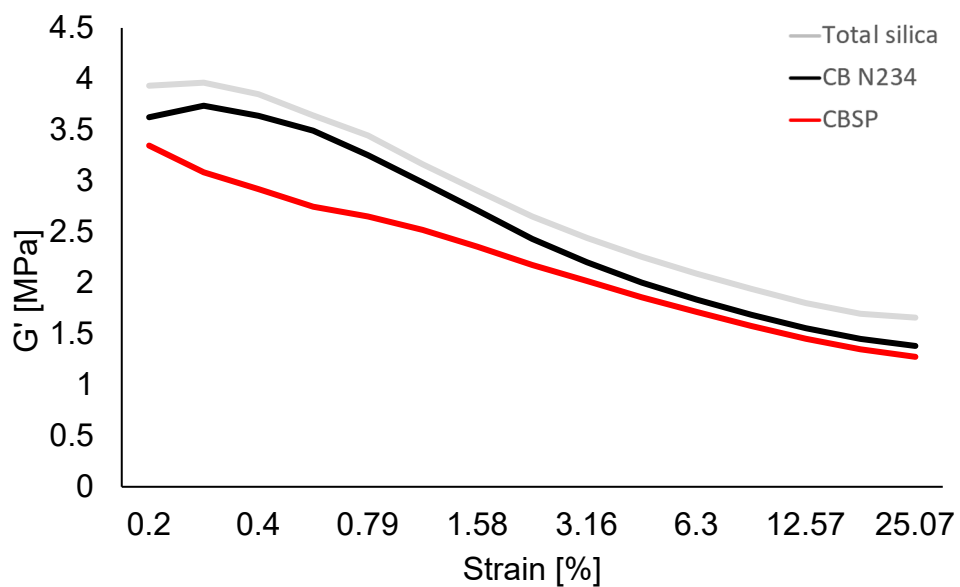

**Figure S3.** Storage modulus curves for S-SBR 4630 compounds.

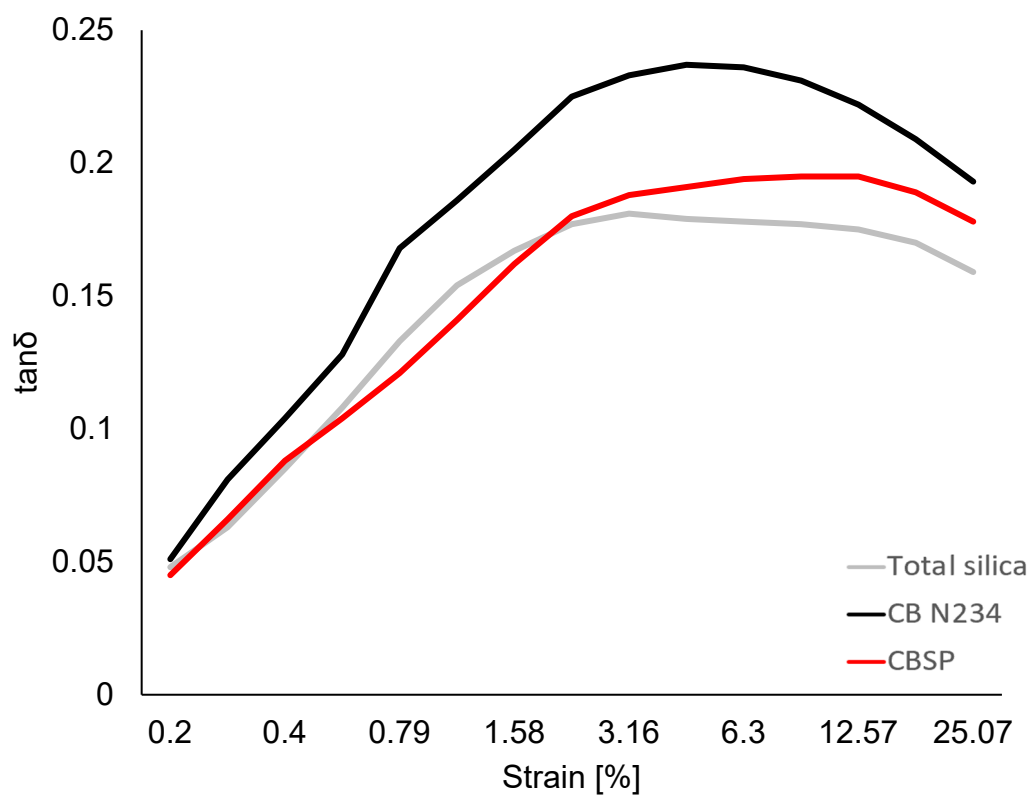

**Figure S4.** Tan delta curves for SBR 4630 compounds.

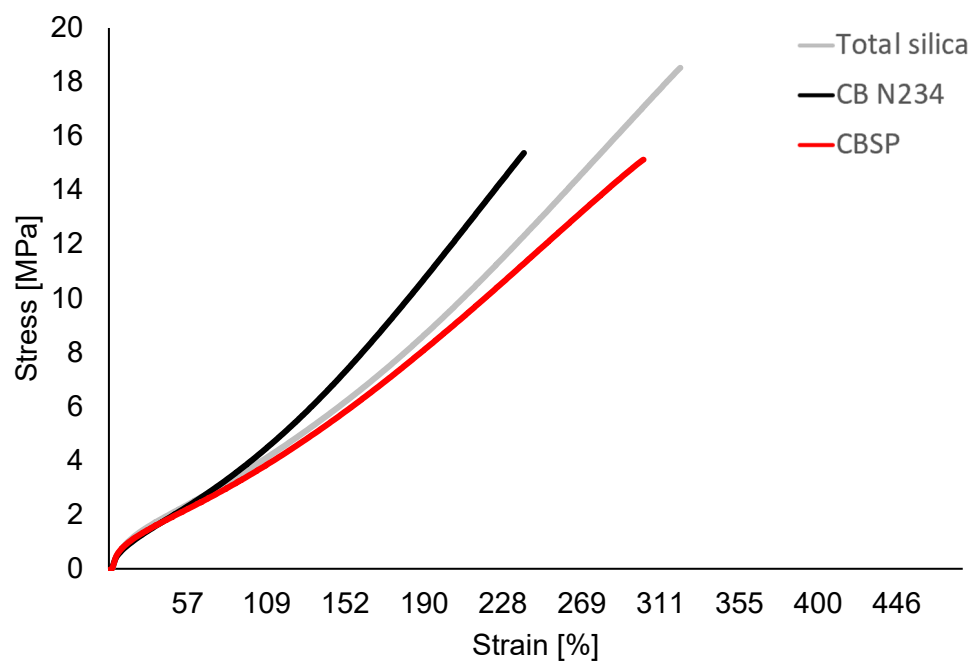

**Figure S5.** Tensile curves of S-SBR 4630 compounds obtained through stress strain experiments.

**Table S2.** Normalized data for curing, dynamic-mechanical (in the shear and axial modes) and tensile properties for composites with CB/PyC as the reinforcing filler<sup>a</sup>.

| Parameter                              | CB/SP <sup>b</sup> | CB/SHP <sup>c</sup><br>33% | CB/SSP <sup>d</sup><br>33% | CB/SSP <sup>d</sup><br>66% |
|----------------------------------------|--------------------|----------------------------|----------------------------|----------------------------|
| <b>t<sub>s1</sub></b>                  | 84                 | 94                         | 94                         | 91                         |
| <b>curing rate</b><br><b>[dNM/min]</b> | 105                | 137                        | 123                        | 140                        |
| <b>ΔG'</b>                             | 92                 | 84                         | 99                         | 93                         |
| <b>E' (10°C)</b>                       | 111                | 118                        | 111                        | 119                        |
| <b>E' (70°C)</b>                       | 103                | 123                        | 112                        | 121                        |
| <b>Tanδ (70°C)</b>                     | 89                 | 92                         | 96                         | 92                         |
| <b>σ<sub>100</sub></b>                 | 76                 | 109                        | 106                        | 118                        |
| <b>σ<sub>200</sub></b>                 | 68                 | 99                         | 102                        | 108                        |
| <b>σ<sub>break</sub></b>               | 98                 | 87                         | 101                        | 101                        |
| <b>ε<sub>break</sub></b>               | 136                | 93                         | 100                        | 99                         |

<sup>a</sup> The reference composite was based on pristine CB. The values of the reference composites were placed = 100.

<sup>b</sup> ref: this work

<sup>c</sup> SHP: Ref [1]

<sup>d</sup> SSP: ref [1]

## References

[1]: Prioglio, G., Naddeo, S., Giese, U., Barbera, V., & Galimberti, M. (2023). Bio-Based Pyrrole Compounds Containing Sulfur Atoms as Coupling Agents of Carbon Black with Unsaturated Elastomers. *Nanomaterials*, 13(20), 2761.
